# Supplementary material for: Trace amines produced by skin bacteria accelerate wound healing in mice
Source: PubMed Central journal article supplement (PMC7264277; doi:10.1038/s42003-020-1000-7), 2020-06-01
Supplement: 42003_2020_1000_MOESM1_ESM.pdf [file 42003_2020_1000_MOESM1_ESM.pdf]

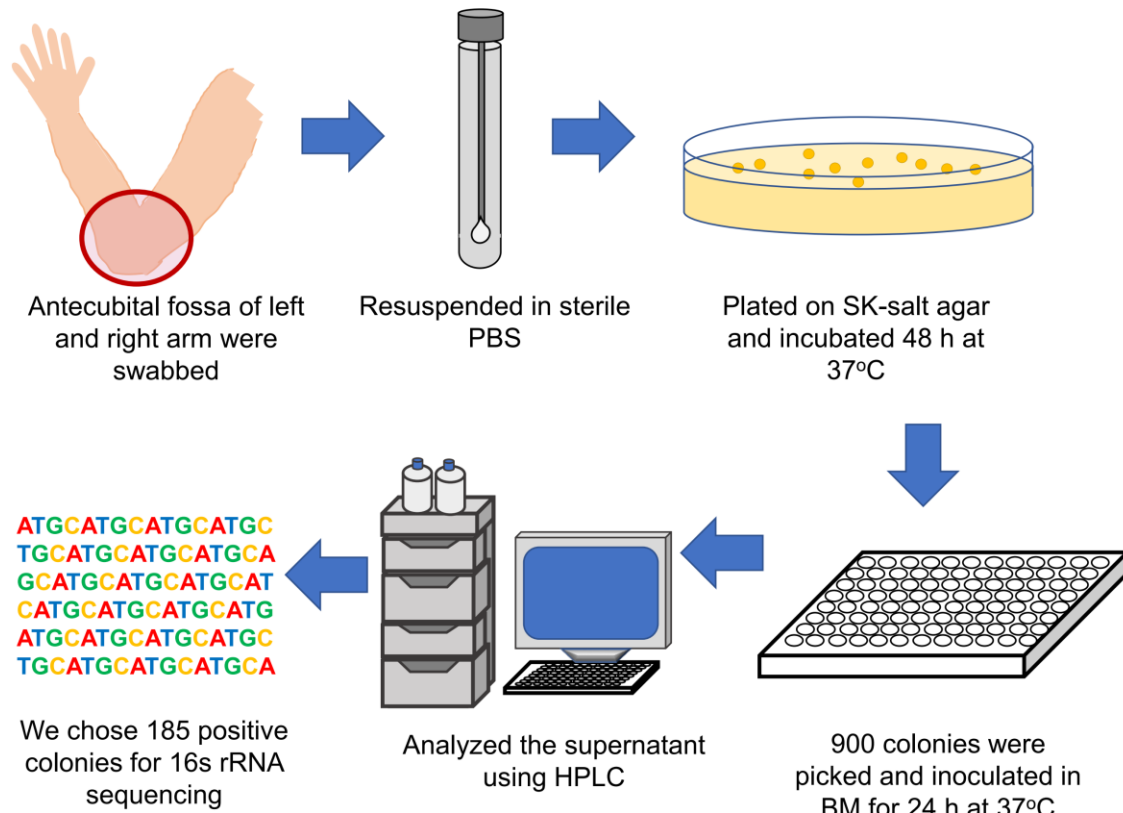

**Supplementary Figure 1. Illustration of the sample collection and analyses workflow.** Skin swab samples were collected from 28 volunteers and selectively grew the staphylococcal strains by spreading the swab samples on SK-salt agar (Luqman et al., 2018). The grown colonies were harvested and analyzed for TAs production by HPLC. The colonies that produce TAs were then identified using 16s rRNA sequencing.

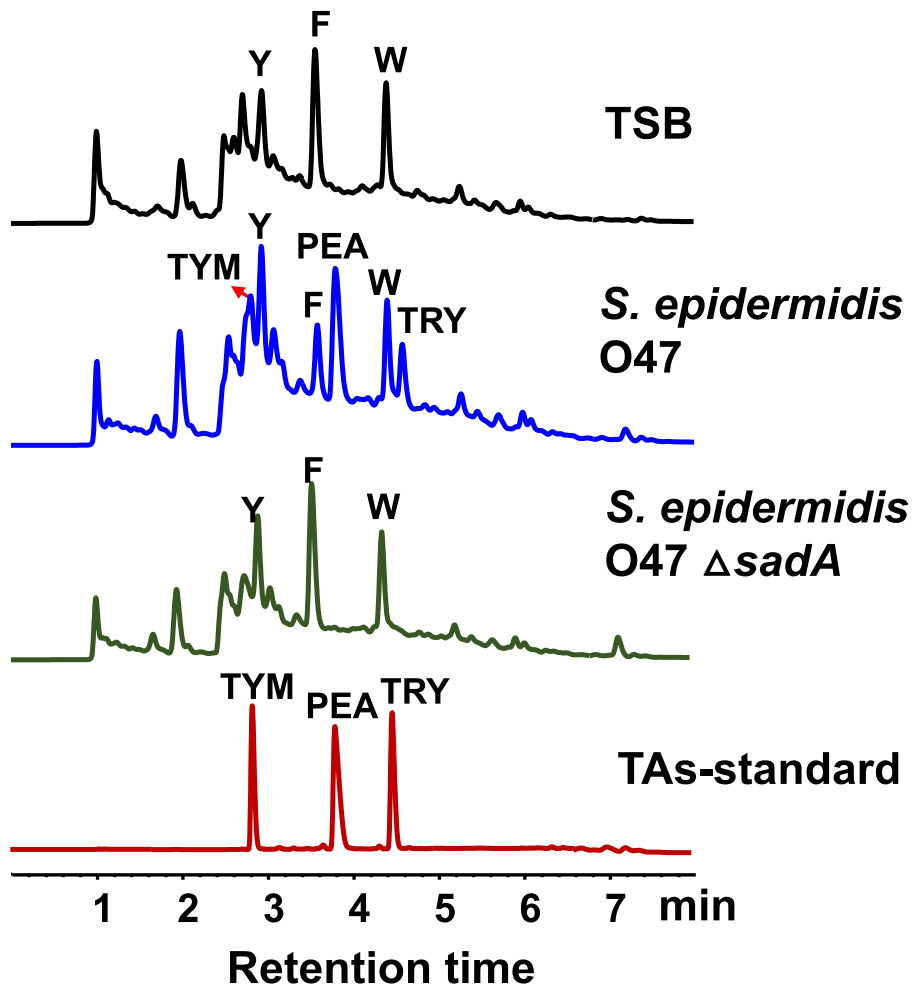

**Supplementary Figure 2. HPLC-analysis of TAs production in *S. epidermidis* O47.** TSB medium contains relatively high amount of AAAs (tryptophan:367, phenylalanine:613, and tyrosine:355  $\mu\text{g/ml}$ ) and *S. epidermidis* O47 converts approximately 20% of the AAAs into TAs (TRY:71, PEA:159, and TYM:57  $\mu\text{g/ml}$ ) (Luqman et al., 2018). In this study, the putative *sadA* gene in *S. epidermidis* O47 is confirmed to be responsible for the TAs production.

**A**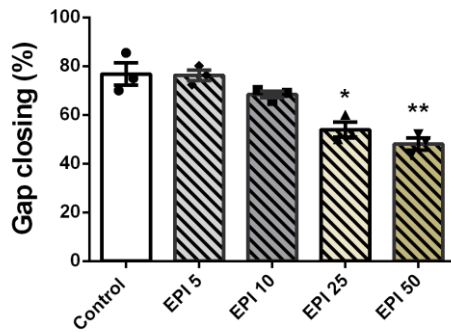**B**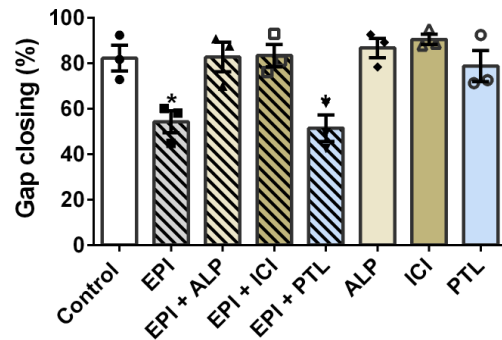

**Supplementary Figure 3. Effect of compounds in *in vitro* wound healing and intracellular calcium in HaCaT cells. (A)** Different concentrations of EPI were added in seeded HaCaT cells and the gap closing was measured after 24 h. **(B)** We also tested alprenolol (ALP, a neutral  $\beta$ 2-AR) in comparison with ICI and phentolamine (PTL, an  $\alpha$ 2-AR antagonist) to examine the role of  $\alpha$ 2-AR in HaCaT cells in gap closing. For all graphs, each data point is the mean value  $\pm$  SEM of 3 independent replications, \* $p < 0.05$  and \*\* $p < 0.01$ , data were analyzed using paired Students t-test. Source data are provided as a Source Data file.

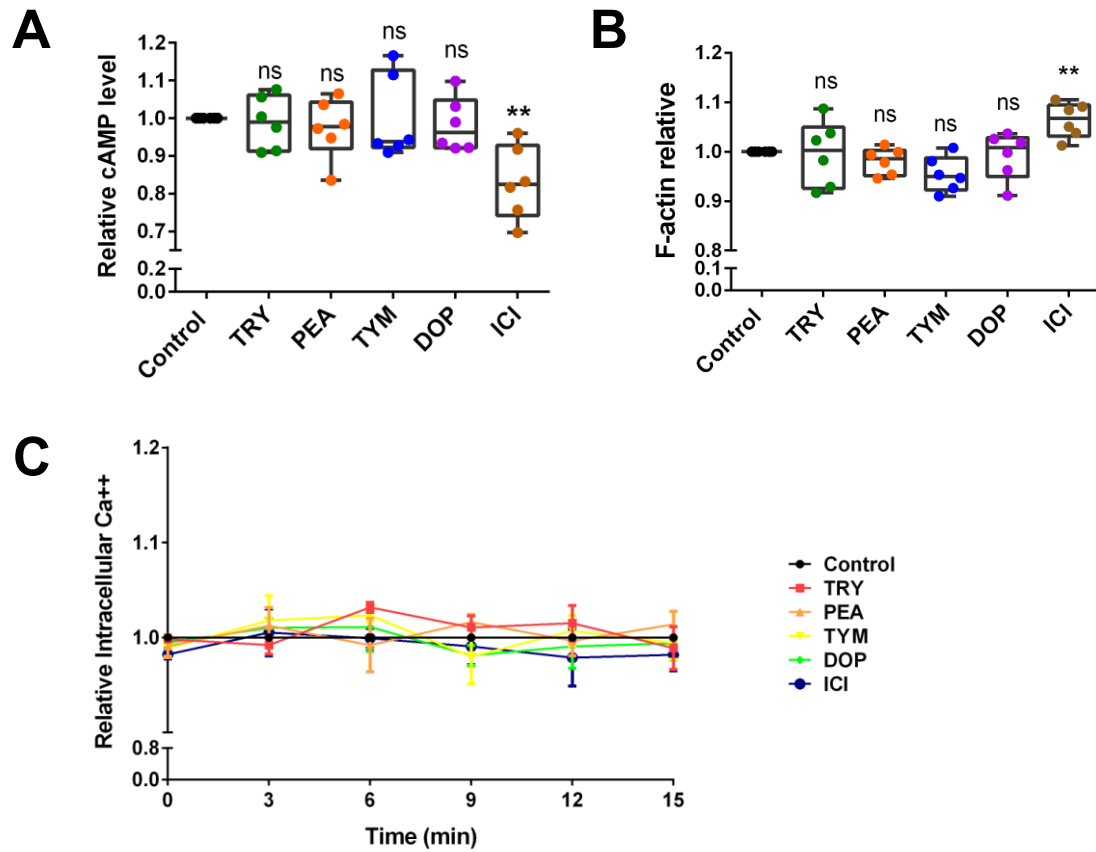

**Supplementary Figure 4. Effect of TAs and DOP on HaCaT cells in the absence of EPI.** We incubated HaCaT cells with TAs, DOP, and ICI (25  $\mu\text{g/ml}$ ) and investigated the effects on **(A)** cAMP level, **(B)** F-actin and **(C)** intracellular  $\text{Ca}^{++}$  level. For all graphs, each data point is the mean value  $\pm$  SEM from 6 independent replications for **(A & B)** and 3 independent replications for **(C)**, \* $p < 0.05$  and \*\* $p < 0.01$ , data were analyzed using Students t-test. Source data are provided as a Source Data file.

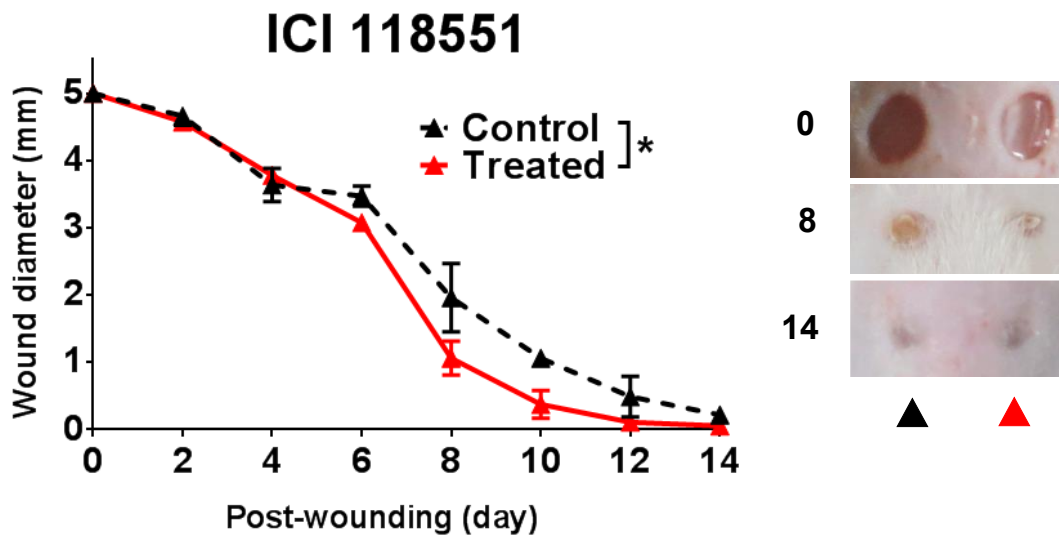

**Supplementary Figure 5. Effect of ICI on wound healing in mice.** Mice were shaved and wounded on their back with 2 biopsy punches for each mouse. ICI (each 25  $\mu\text{g/ml}$ ) with a total volume of 10  $\mu\text{l}$  was applied topically and daily. The diameter of the wounds was measured every 2 days. The wounds treated with ICI showed a significantly faster wound closing than the untreated wounds (control). For all graphs, each data point is the mean value  $\pm$  SEM from 3 independent replications, \* $p < 0.05$  and \*\* $p < 0.01$ , data were analyzed using paired Students t-test. Source data are provided as a Source Data file.

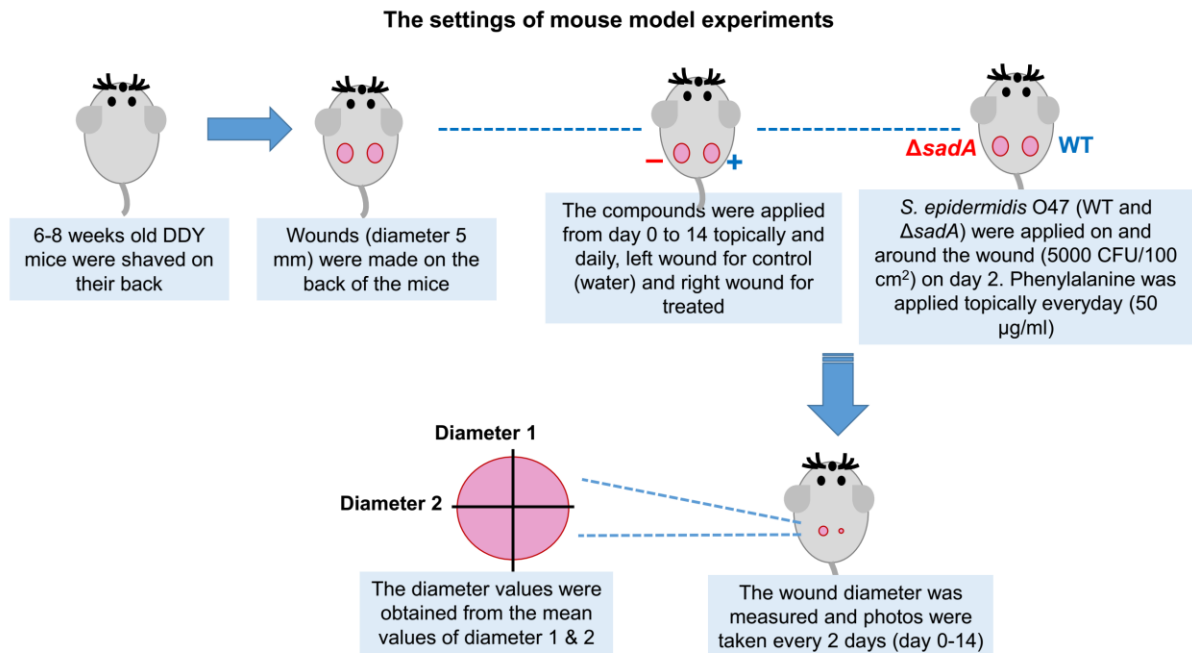

**Supplementary Figure 6. The setting of mouse model experiments.** 6-8 weeks old DDY mice were used for the experiments. Two wounds were made on the back of each mouse and treated with the compounds daily (10  $\mu$ l at 25  $\mu$ g/ml compound) with left as a control (water) and right as treated. For the treatment with bacteria, *S. epidermidis* O47 WT was applied on the right wound and  $\Delta sadA$  on the left wound on day 2 post wounding at cell density 5000 CFU/100 cm<sup>2</sup> on and around the wound. Phenylalanine was applied daily (10  $\mu$ l at 25  $\mu$ g/ml compound). The measurements of wound diameter were performed every 2 days from two diameter values to obtain the mean values.

**Supplementary Table 1. AAA and TA quantification of the skin swab samples.**

| Volunteers | Aromatic amino acid |      |      | Trace amine |      |      |
|------------|---------------------|------|------|-------------|------|------|
|            | Y                   | F    | W    | TYM         | PEA  | TRY  |
| 1          | 5,51                | 2,99 | 3,31 | 2,16        | nd   | 0,55 |
| 2          | 2,79                | 2,3  | 3,17 | 1,92        | nd   | 0,62 |
| 3          | 3,3                 | 2,32 | 3,13 | 3,53        | 0,68 | 3,47 |
| 4          | 2,48                | 2,14 | nd   | 3,38        | nd   | nd   |
| 5          | nd                  | nd   | nd   | 5,43        | nd   | nd   |
| 6          | nd                  | nd   | 3,67 | nd          | nd   | 1,48 |
| 7          | nd                  | nd   | 3,18 | 2,54        | 0,21 | 0,99 |
| 8          | 3,72                | 1,93 | 3,18 | 2,03        | nd   | 0,56 |
| 9          | nd                  | nd   | nd   | 2,56        | nd   | nd   |
| 10         | nd                  | nd   | nd   | 2,54        | nd   | nd   |
| 11         | 5,58                | nd   | nd   | nd          | nd   | nd   |
| 12         | nd                  | 2,05 | 3,09 | 1,88        | nd   | 1,55 |
| 13         | nd                  | nd   | nd   | 2,54        | nd   | nd   |
| 14         | nd                  | nd   | nd   | 3,04        | nd   | 1,6  |
| 15         | 2,68                | 2,08 | nd   | 2,42        | nd   | nd   |
| 16         | nd                  | nd   | nd   | 3,06        | nd   | nd   |
| 17         | 3,34                | 1,93 | nd   | 5,95        | nd   | nd   |
| 18         | nd                  | nd   | nd   | 3,03        | nd   | nd   |
| 19         | nd                  | nd   | 3,09 | 2,15        | nd   | nd   |
| 20         | nd                  | 2,26 | nd   | 2,37        | nd   | 0,48 |
| 21         | nd                  | 2,31 | nd   | 2,28        | nd   | nd   |
| 22         | nd                  | 2,47 | nd   | 2,52        | nd   | nd   |
| 23         | 4,35                | 2,15 | 3,06 | 2,72        | nd   | 0,56 |
| 24         | 2,96                | 2,16 | 3,08 | 1,73        | nd   | nd   |
| 25         | 4,46                | 2,14 | 3,2  | 1,89        | nd   | 2,49 |
| 26         | 2,07                | 2,27 | 3,2  | 2,51        | 0,15 | 2,18 |
| 27         | nd                  | nd   | 3,24 | 2,15        | nd   | nd   |
| 28         | 3,86                | 2,48 | 3,27 | 3,04        | 1,05 | 2,94 |

The values shown are in  $\mu\text{g}/100 \text{ cm}^2$ . Nd: not detectable. Y: tyrosine, F: Phenylalanine, W: tryptophan, TYM: tyramine, PEA: phenethylamine, TRY: tryptamine.

**Supplementary Table 2. Primers**

| <b>Primer</b> | <b>Sequence (5'-3')</b>                               |
|---------------|-------------------------------------------------------|
| <b>27F</b>    | AGAGTTTGATCCTGGCTCAG                                  |
| <b>1392R</b>  | GGTTACCTTGTTACGACTT                                   |
| <b>upF</b>    | CGCGCAGATCTGTGACGATCCTTTTATTTTAAGAATATCTATTTATG<br>TC |
| <b>upR</b>    | ATAATTTCAATTCATTTCCATACTCTCTC-                        |
| <b>downF</b>  | GGAAATGGAAATGAAATTATCGAGCGCATTAAATAC                  |
| <b>downR</b>  | TGCAGGCATGCAAGCTTGATAGGAAAAAATTACCTTAATT              |
