# Supplementary material for: Trace amines produced by skin bacteria accelerate wound healing in mice
Source: PubMed Central journal article supplement (PMC7264277; doi:10.1038/s42003-020-1000-7), 2020-06-01
Supplement: 42003_2020_1000_MOESM2_ESM.pdf [file 42003_2020_1000_MOESM2_ESM.pdf]

## **Description of Additional Supplementary Files**

File Name: Supplementary Data 1

Description: Source data of all the graphs.

File Name: Supplementary Data 2

Description: 16s rDNA sequence data.
